# Supplementary material for: CD14 and CD26 from serum exosomes are associated with type 2 diabetes, exosomal Cystatin C and CD14 are associated with metabolic syndrome and atherogenic index of plasma
Source: PeerJ. 2022 Jul 12;10:e13656. doi: 10.7717/peerj.13656 (PMC9285478; doi:10.7717/peerj.13656)
Supplement: Supplemental Information 4 [file peerj-10-13656-s004.xlsx]

## Sheet: Hoja1
ID	Group	Gender	Age	BMI	SBP	DBP	GLUC	CHOL	TG	HDLc	LDLc	AIP	COMP_MetS	MetS	AOmets	TGmets	HDLmets	BPmets	GLUCmets	CHOLcat	LDLcat	Protein_ug	Prot_conc	Totalprotein	Cystatin	Cystx10_2	CD26	CD14
2	Without T2D	Female	39	22.6801	105	67	89	166	96	65.4	128.5	-0.193	0	No	No	No	No	No	No	No	No	5.22265	2.09	208.91	1.051	105.1	77.85	167.8
6	Without T2D	Female	30	28.5461	117	78	81	167	208	72.2	137.8	0.1	2	No	Yes	Yes	No	No	No	No	Yes	7.28087	2.91	291.23	1.016	101.6	105.3	527.6
10	Without T2D	Female	41	24.5994	136	85	86	214	105	80	75.2	-0.242	1	No	No	No	No	Yes	No	Yes	No	10.957	4.38	438.28	0.946	94.6	85.52	23.04
11	Without T2D	Female	30	23.8319	107	61	97	171	85	58.2	55.5	-0.196	0	No	No	No	No	No	No	No	No	7.38943	2.96	295.58	0.981	98.1	17.4	41.77
13	Without T2D	Female	47	20.3424	103	65	53	205	160	39.9	160	0.243	2	No	No	Yes	Yes	No	No	Yes	Yes	11.2535	4.5	450.14	1.016	101.6	174.28	13.11
15	Without T2D	Female	52	28.0986	129	80	70	192	191	48.1	171.5	0.239	2	No	No	Yes	Yes	No	No	No	Yes	5.78732	2.31	231.49	0.91	91	37.6	169
19	Without T2D	Female	50	23.5938	109	75	30	210	146	30.2	123.4	0.324	1	No	No	No	Yes	No	No	Yes	No	5.34297	2.14	213.72	0.946	94.6	31.89	130.5
21	Without T2D	Male	54	19.4671	105	71	63	186	131	53.9	147.2	0.026	0	No	No	No	No	No	No	No	Yes	14.8302	5.93	593.21	0.981	98.1	31.03	205.3
30	Without T2D	Female	53	30.1484	118	72	102	211	109	42.3	157.4	0.051	3	Yes	Yes	No	Yes	No	Yes	Yes	Yes	1.79711	0.72	72.13	0.874	87.4	102.14	50.66
31	Without T2D	Female	44	28.9627	112	79	68	175	107	58.6	112.2	-0.099	1	No	Yes	No	No	No	No	No	No	4.87341	1.95	194.94	0.946	94.6	108.8	304.5
37	Without T2D	Male	58	26.4594	118	71	76	187	185	67	103.8	0.081	1	No	No	Yes	No	No	No	No	No	2.928	1.17	117.12	0.91	91	20.51	17.78
40	Without T2D	Male	47	30.2926	115	78	80	225	171	22.6	145.8	0.519	3	Yes	Yes	Yes	Yes	No	No	Yes	Yes	3.48278	1.39	139.31	0.946	94.6	17.95	106.3
41	Without T2D	Female	47	27.8865	137	91	58	227	156	29.4	143.2	0.365	4	Yes	Yes	Yes	Yes	Yes	No	Yes	Yes	5.80288	2.32	232.12	0.874	87.4	38.97	101
45	Without T2D	Female	52	32.39	121	70	77	287	252	49	187.6	0.351	3	Yes	Yes	Yes	Yes	No	No	Yes	Yes	3.41212	1.36	136.48	0.91	91	121.69	14.6
54	Without T2D	Female	49	22.2359	97	67	75	223	187	67	125.8	0.086	1	No	No	Yes	No	No	No	Yes	No	7.07281	2.83	282.91	1.016	101.6	90.1	206.9
57	Without T2D	Female	42	21.2179	137	79	68	195	78	28.1	102.2	0.083	2	No	No	No	Yes	Yes	No	No	No	7.92216	3.17	316.89	0.946	94.6	109.1	199.4
65	Without T2D	Female	49	22.7884	97	61	75	208	54	59.4	142.7	-0.401	1	No	Yes	No	No	No	No	Yes	Yes	8.65367	3.46	346.15	1.016	101.6	52.097	205.8
87	Without T2D	Female	56	24.1024	115	62	72	87	92	42.1	96.3	-0.021	1	No	No	No	Yes	No	No	No	No	5.03803	2.02	201.52	0.874	87.4	29.31	30.98
88	Without T2D	Female	51	26.8006	130	72	85	316	155	46.4	223.7	0.164	4	Yes	Yes	Yes	Yes	Yes	No	Yes	Yes	5.69611	2.28	227.84	0.981	98.1	78	291.3
89	Without T2D	Female	44	30.5011	115	77	85	227	142	48.4	148.8	0.107	2	No	Yes	No	Yes	No	No	Yes	Yes	4.28761	1.72	173.1	0.981	98.1	20.3	24.3
90	Without T2D	Female	48	22.7344	115	77	85	227	142	48.4	148.8	0.107	2	No	Yes	No	Yes	No	No	Yes	Yes	4.78159	1.91	191.26	1.016	101.6	89.12	92.03
93	Without T2D	Female	36	25.1613	102	67	81	182	77	61.1	78.6	-0.26	1	No	Yes	No	No	No	No	No	No	2.94116	1.18	117.65	0.981	98.1	56.32	40.02
94	Without T2D	Female	46	27.3411	101	63	93	182	121	33.7	65.5	0.195	2	No	Yes	No	Yes	No	No	No	No	4.82034	1.93	192.81	0.874	87.4	23.14	29.12
95	Without T2D	Female	42	30.2228	113	66	80	237	228	29.3	85.3	0.531	3	Yes	Yes	Yes	Yes	No	No	Yes	No	5.1233	2.05	204.93	0.946	94.6	37.52	10.25
97	Without T2D	Female	32	24.1327	95	68	75	136	82	41.1	78.6	-0.06	1	No	No	No	Yes	No	No	No	No	9.25193	3.7	370.08	1.018	101.8	64.43	97.6
99	Without T2D	Female	46	27.5723	122	73	73	249	113	67.1	148.5	-0.134	1	No	Yes	No	No	No	No	Yes	Yes	7.19586	2.88	287.83	1.051	105.1	37.55	13.02
103	Without T2D	Female	43	23.8083	98	62	70	199	101	35.3	103.9	0.097	1	No	No	No	Yes	No	No	No	No	4.55984	1.82	182.39	0.981	98.1	75.25	6.256
104	Without T2D	Female	54	28.1364	112	67	92	193	155	36	116.5	0.274	3	Yes	Yes	Yes	Yes	No	No	No	No	6.41582	2.57	256.63	0.946	94.6	95.83	35.26
105	Without T2D	Female	59	27.2972	134	80	98	374	192	61.5	207.6	0.134	3	Yes	Yes	Yes	No	Yes	No	Yes	Yes	6.50263	2.6	260.11	0.981	98.1	118.57	52.52
107	Without T2D	Female	60	22.553	104	61	81	306	220	65.3	181	0.167	1	No	No	Yes	No	No	No	Yes	Yes	5.00323	2	200.13	0.981	98.1	26.04	10.3
108	Without T2D	Female	49	30.3171	107	61	89	332	263	40.4	183.3	0.454	3	Yes	Yes	Yes	Yes	No	No	Yes	Yes	7.44058	2.98	297.62	1.016	101.6	68.26	276.6
111	Without T2D	Female	35	21.5287	109	69	80	197	98	54.4	76.3	-0.104	0	No	No	No	No	No	No	No	No	4.13761	1.66	165.5	0.981	98.1	68.61	58.26
112	Without T2D	Female	36	24.5577	91	61	105	182	96	50.8	81	-0.084	1	No	No	No	No	No	Yes	No	No	3.11252	1.25	124.5	1.016	101.6	110.76	36.39
114	Without T2D	Female	39	29.3894	104	62	80	204	119	30.4	121.4	0.233	2	No	Yes	No	Yes	No	No	Yes	No	2.62825	1.05	105.13	1.051	105.1	109.98	8.83
115	Without T2D	Female	39	26.1752	100	66	85	255	78	63.5	166.7	-0.271	1	No	Yes	No	No	No	No	Yes	Yes	4.68177	1.87	187.27	0.91	91	67.3	9.472
117	Without T2D	Female	42	27.6817	107	65	81	205	105	51.3	110	-0.049	0	No	No	No	No	No	No	Yes	No	3.82141	1.53	152.86	0.91	91	23.78	21.06
118	Without T2D	Female	46	27.8944	112	71	82	233	114	44.6	144.2	0.048	2	No	Yes	No	Yes	No	No	Yes	Yes	3.33163	1.33	133.27	0.8	80	128.8	26.96
123	Without T2D	Female	36	41.6	110	59	114	181	160	23.7	103.4	0.469	4	Yes	Yes	Yes	Yes	No	Yes	No	No	8.91828	3.57	356.73	0.981	98.1	39.74	391
133	Without T2D	Female	46	22.5182	101	57	86	197	131	46.6	107.4	0.089	1	No	No	No	Yes	No	No	No	No	8.09429	3.24	323.77	1.016	101.6	159.62	97.55
139	Without T2D	Female	55	27.2752	146	89	100	231	112	71.1	100	-0.163	3	Yes	Yes	No	No	Yes	Yes	Yes	No	2.64001	1.06	105.6	1.051	105.1	18.12	103.3
149	Without T2D	Male	50	31.2686	128	67	104	340	274	63.6	190.8	0.274	2	No	No	Yes	No	No	Yes	Yes	Yes	6.60409	2.64	264.16	1.016	101.6	46.501	37.83
152	Without T2D	Female	50	40.2528	138	74	116	253	290	51.2	160.4	0.393	4	Yes	Yes	Yes	No	Yes	Yes	Yes	Yes	6.94154	2.78	277.66	1.051	105.1	102.5	323.5
153	Without T2D	Female	55	26.7347	106	62	101	226	124	38.4	101.9	0.149	3	Yes	Yes	No	Yes	No	Yes	Yes	No	8.27769	3.31	331.11	0.981	98.1	53.45	527.7
156	Without T2D	Female	57	22.4765	91	59	88	243	436	44.9	78.6	0.627	2	No	No	Yes	Yes	No	No	Yes	No	10.912	4.36	436.48	0.981	98.1	96.62	82.05
157	Without T2D	Male	64	29.0733	117	72	86	246	155	41.6	189	0.211	1	No	No	Yes	No	No	No	Yes	Yes	1.80285	0.72	72.11	1.287	128.7	121	166.9
158	Without T2D	Female	56	39.9788	120	76	101	276	219	58.5	133.4	0.213	3	Yes	Yes	Yes	No	No	Yes	Yes	Yes	2.48342	0.99	99.34	0.946	94.6	91.54	233.3
160	Without T2D	Female	49	29.6486	115	73	91	260	218	53.7	115.6	0.248	2	No	Yes	Yes	No	No	No	Yes	No	10.6047	4.24	424.19	0.981	98.1	31.58	181.8
161	Without T2D	Female	30	24.6294	97	58	86	172	115	46.8	82.2	0.03	1	No	No	No	Yes	No	No	No	No	8.31335	3.33	332.53	1.319	131.9	115	212.3
163	Without T2D	Female	40	27.1627	109	63	85	243	181	62.2	120.3	0.104	1	No	No	Yes	No	No	No	Yes	No	7.10037	2.84	284.01	0.981	98.1	104.7	248.7
167	Without T2D	Female	38	25.2734	114	64	88	301	163	53.9	224.3	0.121	1	No	No	Yes	No	No	No	Yes	Yes	2.88433	1.15	115.37	0.91	91	74.28	80.05
168	Without T2D	Female	64	26.3094	106	68	87	221	145	31.2	168.5	0.307	1	No	No	No	Yes	No	No	Yes	Yes	3.40096	1.36	136.3	0.946	94.6	231.58	19.283
169	Without T2D	Female	34	23.5822	127	81	83	195	137	53.1	135	0.052	0	No	No	No	No	No	No	No	Yes	7.17286	2.87	286.91	0.981	98.1	100.56	144.3
170	Without T2D	Female	45	29.0316	126	68	102	279	344	53.3	219.8	0.45	3	Yes	Yes	Yes	No	No	Yes	Yes	Yes	3.41909	1.37	136.76	1.877	187.7	65.75	151.4
171	Without T2D	Female	53	38.9536	129	77	104	206	119	45.8	126	0.055	3	Yes	Yes	No	Yes	No	Yes	Yes	No	2.65668	1.06	106.27	0.91	91	58.73	151.7
172	Without T2D	Female	54	36.5333	113	67	107	222	169	40.2	132	0.264	4	Yes	Yes	Yes	Yes	No	Yes	Yes	Yes	2.82658	1.13	113.06	0.981	98.1	16.72	192.3
173	Without T2D	Female	45	28.3824	114	73	89	241	87	52.4	162.2	-0.14	1	No	Yes	No	No	No	No	Yes	Yes	3.15615	1.26	126.25	0.91	91	67.15	98.53
174	Without T2D	Female	48	35.7778	123	78	97	225	95	52	143.9	-0.098	1	No	Yes	No	No	No	No	Yes	Yes	2.97335	1.19	118.93	0.91	91	42.48	175.2
175	Without T2D	Female	34	30.2373	102	68	87	218	124	58.3	115.1	-0.032	1	No	Yes	No	No	No	No	Yes	No	5.39383	2.16	216.06	1.051	105.1	64.52	31.35
176	Without T2D	Female	36	21.1457	90	60	95	217	89	43.2	136.2	-0.046	1	No	No	No	Yes	No	No	Yes	Yes	5.24783	2.1	209.91	0.981	98.1	101.35	17.28
179	Without T2D	Female	57	25.3966	121	79	85	317	106	66.9		-0.16	0	No	No	No	No	No	No	Yes		7.0262	2.81	281.05	0.981	98.1	44.45	234.6
180	Without T2D	Female	51	35.7333	117	73	78	264	179	54.3	135.1	0.158	2	No	Yes	Yes	No	No	No	Yes	Yes	9.98531	3.99	399.41	1.012	101.2	66.16	37.9
181	Without T2D	Female	53	24.3999	101	61	88	333	456	36.5	148.9	0.737	2	No	No	Yes	Yes	No	No	Yes	Yes	3.93899	1.58	157.56	1.016	101.6	44.246	97.6
183	Without T2D	Female	50	30.5826	124	62	99	205	127	42.6	75.7	0.114	2	No	Yes	No	Yes	No	No	Yes	No	2.96014	1.18	118.41	0.981	98.1	41.03	82.61
184	Without T2D	Female	57	30.3193	119	70	92	244	228	55.6	151.9	0.253	2	No	Yes	Yes	No	No	No	Yes	Yes	4.70213	1.88	188.09	0.981	98.1	41.03	117.1
187	Without T2D	Female	53	22.5446	91	53	89	260	65	115.2	149.9	-0.609	0	No	No	No	No	No	No	Yes	Yes	1.8067	0.72	72.27	1.051	105.1	123.48	83.49
189	Without T2D	Female	47	33.5315	118	64	124	268	158	74	234.6	-0.031	3	Yes	Yes	Yes	No	No	Yes	Yes	Yes	3.42108	1.37	136.84	0.981	98.1	106.1	17.27
194	Without T2D	Female	58	32.0083	130	79	83	225	119	52.3	148.9	-0.003	2	No	Yes	No	No	Yes	No	Yes	Yes	2.79216	1.12	111.69	1.016	101.6	85.44	206.7
201	Without T2D	Male	50	23.1562	97	61	80	228	199	41.5	146.7	0.321	1	No	No	Yes	No	No	No	Yes	Yes	5.78213	2.31	231.29	0.981	98.1	56.28	189.6
203	Without T2D	Male	43	30.9642	121	80	110	234	313	41.3	130.1	0.52	3	Yes	Yes	Yes	No	No	Yes	Yes	Yes	7.86847	3.15	314.74	1.12	112	95.83	66.32
214	Without T2D	Female	50	23.4081	121	78	93	260	188	66.5	229.3	0.091	2	No	Yes	Yes	No	No	No	Yes	Yes	3.64834	1.46	145.93	1.154	115.4	40.42	198.8
215	Without T2D	Female	43	26.9896	119	72	106	241	182				3	Yes	Yes	Yes		No	Yes	Yes		2.68184	1.07	107.27	0.874	87.4	27.12	97.6
216	Without T2D	Female	57	29.3778	113	62	99	267	148				1	No	Yes	No		No	No	Yes		1.60925	0.64	64.37	0.91	91	92.48	199.5
217	Without T2D	Female	54	40.599	168	93	87	221	158				3	Yes	Yes	Yes		Yes	No	Yes		1.83239	0.73	73.3	1.352	135.2	75.3	190.1
218	Without T2D	Female	44	30.5	121	74	86	229	159				1	No	Yes			No				1.85854	0.74	74.4	0.981	98.1	78.94	6.81
1001	With T2D	Female	47	30.1246	112	74	102	313	205				2	No	No	Yes		No	Yes	Yes		3.54164	1.42	141.67	1.016	101.6	55.44	297.3
1009	With T2D	Female	58	23.8672	148	81	316	180	224	62.7	265.8	0.193	4	Yes	Yes	Yes	No	Yes	Yes	No	Yes	7.49774	3	300.13	1.016	101.6	57.62	286.3
1012	With T2D	Female	49	26.6564	118	71	246	274	452	42.1	82.6	0.671	4	Yes	Yes	Yes	Yes	No	Yes	Yes	No	8.57951	3.43	344.01	1.12	112	181.5	705
1014	With T2D	Female	46	34.4132	130	83	105	196	114	50.9	74.3	-0.01	3	Yes	Yes	No	No	Yes	Yes	No	No	6.23714	2.49	249.49	1.016	101.6	15.44	73.99
1015	With T2D	Male	64	23.1755	140	69	109	172	144	32.7	88.5	0.284	3	Yes	No	No	Yes	Yes	Yes	No	No	5.75376	2.3	230.01	2.642	264.2	222.6	355.1
1017	With T2D	Female	60	28.7201	141	72	103	214	170	55.3	138.3	0.128	4	Yes	Yes	Yes	No	Yes	Yes	Yes	Yes	7.7919	3.12	312.05	0.981	98.1	20.81	61.7
1019	With T2D	Female	47	28.8046	161	80	284	224	213	68.5	153.2	0.133	4	Yes	Yes	Yes	No	Yes	Yes	Yes	Yes	5.74791	2.3	229.92	1.051	105.1	70.24	108.8
1020	With T2D	Female	47	32.1522	141	78	63	192	124	48.4	155.3	0.049	3	Yes	Yes	No	Yes	Yes	No	No	Yes	2.88993	1.16	116.11	0.946	94.6	219.91	94.87
1021	With T2D	Female	56	22.9344	125	67	118	295	121	62.7	228.8	-0.075	1	No	No	No	No	No	Yes	Yes	Yes	5.24217	2.1	209.69	0.91	91	57.47	213.4
1022	With T2D	Female	62	27.8935	118	60	133	206	118	47.6	180.8	0.034	3	Yes	Yes	No	Yes	No	Yes	Yes	Yes	1.60658	0.64	64.26	1.018	101.8	85.3	84.8
1026	With T2D	Male	43	24.0055	163	96	88	316	180	66.1	178.8	0.075	2	No	No	Yes	No	Yes	No	Yes	Yes	5.51991	2.21	221.3	1.187	118.7	50.16	829.7
1031	With T2D	Female	39	20.1333	126	70	35	229	495	62.1	154	0.541	2	No	Yes	Yes	No	No	No	Yes	Yes	4.81218	1.92	192.49	0.946	94.6	95.04	94.261
1032	With T2D	Female	36	29.0121	102	65	96	217	271	47.7	171.1	0.394	3	Yes	Yes	Yes	Yes	No	No	Yes	Yes	8.2129	3.29	328.52	1.051	105.1	377.6	767.2
1034	With T2D	Female	56	26.8133	130	78	196	228	154	58.2	169.3	0.063	3	Yes	No	Yes	No	Yes	Yes	Yes	Yes	4.94186	1.98	197.67	1.051	105.1	85.3	374.6
1035	With T2D	Female	55	31.004	118	63	70	284	272	57.4	225.4	0.316	2	No	Yes	Yes	No	No	No	Yes	Yes	7.4086	2.96	296.34	0.981	98.1	131	422.6
1036	With T2D	Female	53	33.8902	137	83	68	121	303	37.5	68.5	0.547	4	Yes	Yes	Yes	Yes	Yes	No	No	No	10.2831	4.11	411.05	0.946	94.6	36.83	165.2
1039	With T2D	Female	46	31.6443	134	93	205	211	181	37.8	171.8	0.32	5	Yes	Yes	Yes	Yes	Yes	Yes	Yes	Yes	6.95212	2.78	278.08	1.051	105.1	31.36	422.6
1040	With T2D	Male	56	23.56	134	83	141	195	142	33.8	161.5	0.263	3	Yes	No	No	Yes	Yes	Yes	No	Yes	2.95065	1.18	118.03	1.154	115.4	55.44	136.6
1042	With T2D	Female	44	24.0664	90	60	62	136	133	39.8	96.2	0.164	1	No	No	No	Yes	No	No	No	No	3.70568	1.48	148.23	0.91	91	330.66	17.35
1044	With T2D	Female	52	19.8066	125	74	87	181	204	34.4	190.6	0.413	3	Yes	Yes	Yes	Yes	No	No	No	Yes	10.8827	4.35	435.3	0.981	98.1	41.11	204.7
1045	With T2D	Female	63	34.8889	136	63	89	188	140	38.8	104.2	0.197	3	Yes	Yes	No	Yes	Yes	No	No	No	3.7013	1.48	148.05	1.12	112	85.3	229.3
1046	With T2D	Female	60	26.0375	116	57	104	239	164	51.2	106.5	0.146	3	Yes	Yes	Yes	No	No	Yes	Yes	No	5.49965	2.2	219.99	1.051	105.1	85.3	692.8
1048	With T2D	Female	55	28.0661	111	62	99	247	185	41	138.9	0.294	3	Yes	Yes	Yes	Yes	No	No	Yes	Yes	5.04418	2.02	201.77	1.016	101.6	90.29	115.5
1049	With T2D	Female	54	35.2445	127	81	148	150	118	32.1	69	0.205	3	Yes	Yes	No	Yes	No	Yes	No	No	7.5366	3.01	301.46	1.384	138.4	152	652.5
1050	With T2D	Female	47	32.2418	118	64	238	212	267	38.1	111.1	0.486	4	Yes	Yes	Yes	Yes	No	Yes	Yes	No	8.37803	3.35	335.1	1.051	105.1	60.66	421.1
1052	With T2D	Female	59	20.9977	169	81	145	246	183	47.9	119.8	0.222	4	Yes	No	Yes	Yes	Yes	Yes	Yes	No	5.30386	2.12	212.15	1.319	131.9	97.28	245.8
1054	With T2D	Male	50	28.4551	96	67	144	261	136	50.7	150.4	0.069	1	No	No	No	No	No	Yes	Yes	Yes	8.49065	3.4	340.02	1.016	101.6	80.92	329.5
1055	With T2D	Female	49	35.5113	195	93	358	219	185	33	94.4	0.389	5	Yes	Yes	Yes	Yes	Yes	Yes	Yes	No	10.9339	4.37	437.99	1.574	157.4	137.8	1004
1057	With T2D	Female	48	28.5134	118	71	100	185	176	47.7	114.3	0.207	4	Yes	Yes	Yes	Yes	No	Yes	No	No	5.16404	2.07	207.11	0.874	87.4	85.3	76.464
1058	With T2D	Female	58	29.6939	173	87	94	264	271	47.1	168.5	0.4	4	Yes	Yes	Yes	Yes	Yes	No	Yes	Yes	9.92989	3.97	397.2	1.12	112	78.66	622.8
1060	With T2D	Female	64	28.7829	123	65	277	174	127	51.4	129.1	0.033	2	No	Yes	No	No	No	Yes	No	No	4.56694	1.83	182.68	0.91	91	93.46	308.6
1063	With T2D	Female	60	24.7878	111	76	175	251	172	66.9	159.1	0.05	2	No	No	Yes	No	No	Yes	Yes	Yes	4.65123	1.86	186.05	0.946	94.6	61.24	245.8
1066	With T2D	Female	63	32.2473	132	80	94	203	187	35	123.5	0.368	4	Yes	Yes	Yes	Yes	Yes	No	Yes	No	10.1296	4.05	405.18	0.874	87.4	95.04	332.2
1067	With T2D	Female	50	31.1828	127	69	77	214	145	41.8	156.9	0.18	2	No	Yes	No	Yes	No	No	Yes	Yes	9.52779	3.81	381.11	1.016	101.6	20.24	267.2
1069	With T2D	Female	62	27.2889	129	72	112	187	195	25.8	140.4	0.518	4	Yes	Yes	Yes	Yes	No	Yes	No	Yes	5.93896	2.38	237.56	0.946	94.6	317.4	596
1070	With T2D	Female	48	25.6889	106	65	110	131	352	32.3	72.5	0.677	4	Yes	Yes	Yes	Yes	No	Yes	No	No	13.5575	5.42	542.3	1.221	122.1	69.51	681.9
1071	With T2D	Female	53	37.1055	105	68	83	237	239	63.4	170.3	0.216	2	No	Yes	Yes	No	No	No	Yes	Yes	13.6544	5.46	546.18	1.05	105	498.9	287.1
1074	With T2D	Female	61	32.37	128	59	113	153	140	43.9	123.4	0.144	3	Yes	Yes	No	Yes	No	Yes	No	No	4.38541	1.75	175.42	0.946	94.6	69.07	636.3
1075	With T2D	Female	53	35.3778	111	72	149	213	245	40	159.2	0.427	4	Yes	Yes	Yes	Yes	No	Yes	Yes	Yes	16.5634	6.63	662.54	1.012	101.2	159.62	245.8
1076	With T2D	Female	49	26.2708	110	70	67	176	230	31.2	130.7	0.508	3	Yes	Yes	Yes	Yes	No	No	No	Yes	1.81528	0.73	72.61	0.874	87.4	85.3	205.4
1078	With T2D	Male	54	24.2275	118	71	191	139	141	37.8	100.6	0.212	2	No	No	No	Yes	No	Yes	No	No	4.14501	1.66	165.8	0.981	98.1	24.5	502.4
1082	With T2D	Male	54	28.7396	123	74	202	188	117	25.4	104.6	0.303	2	No	No	No	Yes	No	Yes	No	No	4.00833	1.6	160.33	0.946	94.6	85.3	65.85
1083	With T2D	Male	55	28.4429	127	75	150	219	134	24.5	124.3	0.378	2	No	No	No	Yes	No	Yes	Yes	No	1.9399	0.78	77.6	0.946	94.6	90.35	66.4
1084	With T2D	Female	55	24.2091	133	79	193	163	200	50.7	123.8	0.236	3	Yes	Yes	Yes	No	No	Yes	No	No	2.27221	0.91	90.89	0.981	98.1	27.12	153
1087	With T2D	Male	52	32.0924	120	80	216	150	151	51.6	130.7	0.106	2	No	No	Yes	No	No	Yes	No	Yes	1.94624	0.78	77.85	1.025	102.5	85.3	249.2
1090	With T2D	Female	53	20.8467	103	70	101	185	145	53.9	101.5	0.07	1	No	No	No	No	No	Yes	No	No	5.32702	2.13	213.13	0.981	98.1	32.62	219
1091	With T2D	Female	48	32.7705	113	69	113	271	214	33.4	86.6	0.447	4	Yes	Yes	Yes	Yes	No	Yes	Yes	No	9.4618	3.78	378.09	1.287	128.7	449.5	253.3
1093	With T2D	Female	59	29.4724	175	82	76	250	196	24.3	96.9	0.547	4	Yes	Yes	Yes	Yes	Yes	No	Yes	No	1.92645	0.77	77.06	1.051	105.1	201	83.36
1097	With T2D	Female	51	28.3413	100	69	281	282	491	30.3	117.3	0.85	4	Yes	Yes	Yes	Yes	No	Yes	Yes	No	6.01805	2.41	240.72	1.319	131.9	74.93	519.7
1099	With T2D	Male	47	26.7556	122	77	84	252	222	52.1	123.3	0.269	1	No	No	Yes	No	No	No	Yes	No	4.94581	1.98	197.83	0.946	94.6	62.88	87.67
1101	With T2D	Female	54	26.5322	131	79	321	174	149	58.5	108.7	0.046	2	No	No	No	No	Yes	Yes	No	No	9.65773	3.86	386.99	0.981	98.1	62.66	536
1103	With T2D	Male	58	19.6752	109	81	354	152	74	51.3	98.2	-0.201	1	No	No	No	No	No	Yes	No	No	3.40431	1.36	136.02	0.91	91	299.08	958.4
1105	With T2D	Female	42	25.9181	138	77	224	367	179	61.4	203.8	0.105	4	Yes	Yes	Yes	No	Yes	Yes	Yes	Yes	5.01838	2.01	201.18	0.946	94.6	50.76	23.85
1106	With T2D	Female	55	25.1821	146	79	74	307	163	42.6	150.7	0.223	4	Yes	Yes	Yes	Yes	Yes	No	Yes	Yes	6.66763	2.67	267.65	1.016	101.6	19.1	303.4
1107	With T2D	Female	45	33.912	94	65	267	239	80	52	145	-0.173	2	No	Yes	No	No	No	Yes	Yes	Yes	5.01653	2.01	200.66	0.946	94.6	85.3	211.8
1108	With T2D	Female	47	23.4552	99	72	67	183	63	45.3	136.2	-0.217	2	No	Yes	No	Yes	No	No	No	Yes	3.7313	1.49	149.25	1.018	101.8	89.49	85.9
1112	With T2D	Female	39	33.288	111	82	172	277	147	42.7	165.8	0.177	3	Yes	Yes	No	Yes	No	Yes	Yes	Yes	5.2319	2.09	209.28	1.051	105.1	235.2	162
1113	With T2D	Female	46	40.6169	129	69	89	212	213	48	143.1	0.287	3	Yes	Yes	Yes	Yes	No	No	Yes	Yes	4.15307	1.66	166.12	0.91	91	89.44	71.447
1114	With T2D	Female	48	35.4038	115	67	116	218	192	39.5	171.5	0.327	4	Yes	Yes	Yes	Yes	No	Yes	Yes	Yes	7.0262	2.81	281.05	1.016	101.6	71.41	184
1116	With T2D	Male	60	35.4631	158	93	200	182	100	36.5	119.8	0.078	3	Yes	No	No	Yes	Yes	Yes	No	No	10.7952	4.32	431.81	1.02	102	55.442	42.15
1117	With T2D	Female	53	21.0204	158	70	237	260	123	29	147.1	0.267	3	Yes	No	No	Yes	Yes	Yes	Yes	Yes	6.64242	2.66	266.54	1.016	101.6	30.02	316.1
1123	With T2D	Male	58	25.5999	150	86	271	227	230	42.2	138.8	0.376	3	Yes	No	Yes	No	Yes	Yes	Yes	Yes	4.07907	1.63	163.01	0.874	87.4	114.4	105.8
1125	With T2D	Female	45	32.6327	138	77	138	184	129	48.3	76.1	0.062	4	Yes	Yes	No	Yes	Yes	Yes	No	No	4.09156	1.64	164.05	1.016	101.6	85.87	99.67
1130	With T2D	Male	57	29.7913	123	73	225	127	101	45.1			1	No	No	No		No	Yes	No		4.83496	1.93	193.4	0.874	87.4	84.722	605.3
1131	With T2D	Female	57	28.2886	107	66	211	195	139	58.3	118.4	0.017	2	No	Yes	No	No	No	Yes	No	No	2.10631	0.84	84.25	0.874	87.4	45.33	399.9
1132	With T2D	Female	57	28.4135	100	60	103	138	336	33.1	76.3	0.646	4	Yes	Yes	Yes	Yes	No	Yes	No	No	4.87596	1.95	195.04	0.946	94.6	273.91	60.76
1133	With T2D	Female	64	34.7153	125	60	104	131	55	56.2	64.8	-0.369	2	No	Yes	No	No	No	Yes	No	No	7.54158	3.02	301.66	1.016	101.6	142.13	74.23
1135	With T2D	Female	60	25.9302	114	62	151	154	68	44.8	143.2		1	No	Yes	No		No		No	Yes	3.00765	1.2	120.31	1.016	101.6	143.4	304.6
1136	With T2D	Female	50	25.1307	122	67	120	107	65	33.1	73.9	-0.067	2	No	Yes	No	Yes	No		No	No	4.2075	1.68	168.3	1.016	101.6	98.2	259.6
1141	With T2D	Female	32	27.9683	120	84	247	156	122	36.5	127.7	0.164	3	Yes	Yes	No	Yes	No	Yes	No	No	1.86757	0.75	74.7	0.91	91	101.16	361.4
1144	With T2D	Female	49	23.7088	99	62	144	271	275	67.8	203.4	0.248	3	Yes	Yes	Yes	No	No	Yes	Yes	Yes	3.83437	1.53	153.37	0.981	98.1	41.03	32.4
1145	With T2D	Female	64	28.6012	122	58	83	144	71	44.6	98.3	-0.158	2	No	Yes	No	Yes	No	No	No	No	2.12732	0.85	85.09	0.981	98.1	116.21	14.67
1146	With T2D	Female	61	26.6655	120	60	66	135	227	43.9	91	0.354	3	Yes	Yes	Yes	Yes	No	No	No	No	1.51323	0.61	60.53	0.91	91	87.98	39.8
